# Supplementary material
Source: MDPI journal article supplement (https://www.mdpi.com/1424-8247/14/12/1324)
Supplement: s1 [file s1]

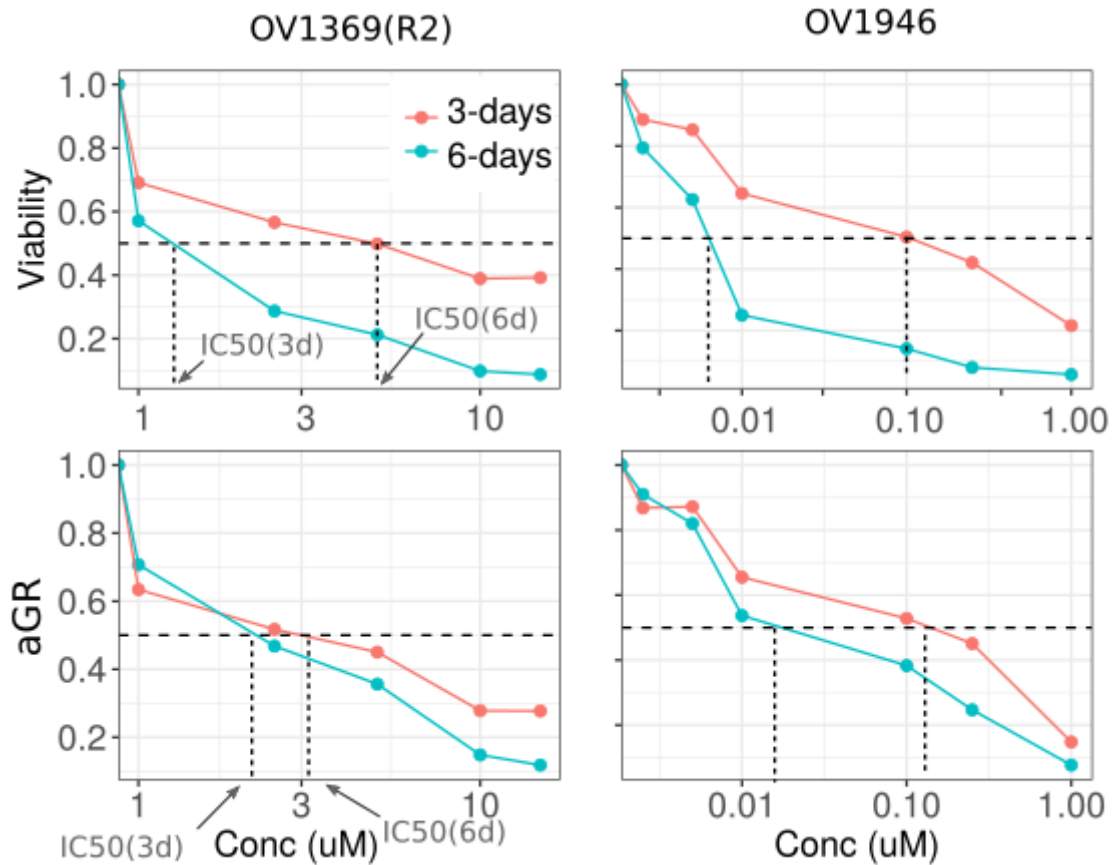

**Figure S1. Time dependence of the conventional metrics.**

Viability and aGR for different assay durations (3-days and 6-days) were compared for OV1369(R2) and OV1946 cells respectively. Detailed values of each metric evaluation are in Supplementary Table 1. Clearly 6-days assay displayed a lower viability in the most of concentration range, that is, a more sensitive response curve. For both viability- and aGR-dose-responses, the concentrations corresponding to the half maximal inhibition were lower in 6-days assay than in 3-days one.

**Table S1. Detail calculations in evaluation of the public data with each drug-response metric.**

| Cell line  | Conc.<br>(uM) | Fold change |          | a. Viability |         |
|------------|---------------|-------------|----------|--------------|---------|
|            |               | at day 3    | at day 6 | at day3      | at day6 |
| OV1369(R2) | 0.0           | 3.770       | 14.048   | 1.000        | 1.000   |
|            | 1.0           | 2.605       | 8.021    | 0.691        | 0.571   |
|            | 2.5           | 2.133       | 4.027    | 0.566        | 0.287   |
|            | 5.0           | 1.878       | 2.982    | 0.498        | 0.212   |
|            | 10.0          | 1.467       | 1.372    | 0.389        | 0.098   |
|            | 15.0          | 1.476       | 1.220    | 0.392        | 0.087   |
| OV1946     | 0.0000        | 5.234       | 27.554   | 1.000        | 1.000   |
|            | 0.0025        | 4.638       | 21.890   | 0.886        | 0.794   |
|            | 0.0050        | 4.463       | 17.250   | 0.853        | 0.626   |
|            | 0.0100        | 3.382       | 6.894    | 0.646        | 0.250   |
|            | 0.1000        | 2.638       | 3.890    | 0.504        | 0.141   |
|            | 0.2500        | 2.204       | 2.200    | 0.421        | 0.080   |
|            | 1.0000        | 1.132       | 1.566    | 0.216        | 0.057   |

| b. Apparent growth rate (aGR) based metric |        |               |               |                                             |           |         |           |               |                                                  |           |         |           |               |
|--------------------------------------------|--------|---------------|---------------|---------------------------------------------|-----------|---------|-----------|---------------|--------------------------------------------------|-----------|---------|-----------|---------------|
| end point calculation                      |        |               |               | simple exponential fitting (3 days fitting) |           |         |           |               | simple exponential fitting (6 days full fitting) |           |         |           |               |
|                                            |        | aGR<br>(day3) | aGR<br>(day6) | apparent<br>k(c)                            | std.error | t-value | p-value   | aGR<br>(day3) | apparent<br>k(c)                                 | std.error | t-value | p-value   | aGR<br>(day6) |
| OV1369(R2)                                 | 0.0    | 1.000         | 1.000         | 0.432                                       | 0.005     | 78.570  | 1.204E-17 | 1.000         | 0.445                                            | 0.001     | 487.717 | 1.792E-49 | 1.000         |
|                                            | 1.0    | 0.649         | 0.727         | 0.306                                       | 0.005     | 60.314  | 2.853E-16 | 0.634         | 0.343                                            | 0.002     | 218.204 | 4.312E-41 | 0.707         |
|                                            | 2.5    | 0.485         | 0.441         | 0.260                                       | 0.003     | 78.320  | 1.251E-17 | 0.517         | 0.247                                            | 0.002     | 118.704 | 9.422E-35 | 0.468         |
|                                            | 5.0    | 0.390         | 0.332         | 0.232                                       | 0.007     | 34.266  | 2.429E-13 | 0.450         | 0.195                                            | 0.003     | 65.575  | 1.381E-28 | 0.356         |
|                                            | 10.0   | 0.222         | 0.086         | 0.153                                       | 0.006     | 24.720  | 1.161E-11 | 0.278         | 0.088                                            | 0.007     | 13.487  | 1.074E-12 | 0.148         |
|                                            | 15.0   | 0.226         | 0.054         | 0.152                                       | 0.007     | 22.572  | 3.382E-11 | 0.277         | 0.071                                            | 0.008     | 8.747   | 6.274E-09 | 0.118         |
| OV1946                                     | 0.0000 | 1.000         | 1.000         | 0.541                                       | 0.006     | 96.676  | 1.003E-18 | 1.000         | 0.562                                            | 0.002     | 298.238 | 2.393E-44 | 1.000         |
|                                            | 0.0025 | 0.901         | 0.906         | 0.488                                       | 0.009     | 56.285  | 6.524E-16 | 0.868         | 0.525                                            | 0.002     | 279.417 | 1.143E-43 | 0.910         |
|                                            | 0.0050 | 0.871         | 0.813         | 0.489                                       | 0.006     | 78.848  | 1.154E-17 | 0.872         | 0.486                                            | 0.002     | 251.980 | 1.365E-42 | 0.820         |
|                                            | 0.0100 | 0.666         | 0.497         | 0.393                                       | 0.006     | 67.419  | 7.527E-17 | 0.655         | 0.348                                            | 0.005     | 71.018  | 2.057E-29 | 0.537         |
|                                            | 0.1000 | 0.501         | 0.328         | 0.331                                       | 0.005     | 64.301  | 1.327E-16 | 0.528         | 0.263                                            | 0.006     | 43.021  | 3.140E-24 | 0.383         |
|                                            | 0.2500 | 0.392         | 0.179         | 0.290                                       | 0.008     | 37.772  | 7.622E-14 | 0.451         | 0.179                                            | 0.010     | 18.722  | 7.967E-16 | 0.247         |
|                                            | 1.0000 | 0.053         | 0.098         | 0.107                                       | 0.020     | 5.266   | 1.990E-04 | 0.148         | 0.060                                            | 0.007     | 8.992   | 3.752E-09 | 0.077         |

| c. Phenotype metric |        |                                                             |           |         |           |                                 |                  |                      |                |        |                                           |
|---------------------|--------|-------------------------------------------------------------|-----------|---------|-----------|---------------------------------|------------------|----------------------|----------------|--------|-------------------------------------------|
|                     |        | Metric1. Overall growth rate (GR)<br>by kinetic measurement |           |         |           | Metric2.<br>Phenotype fractions |                  | Resulting parameters |                |        |                                           |
|                     |        | k(c)=<br>k <sub>0</sub> -k <sub>d</sub> -s                  | std.error | t-value | p-value   | k <sub>d</sub> /k <sub>p</sub>  | s/k <sub>p</sub> | k <sub>p</sub>       | k <sub>d</sub> | s      |                                           |
| OV1369(R2)          | 0.0    | 0.438                                                       | 0.008     | 55.540  | 5.185E-26 | 0.036                           | 0.024            | 0.466                | 0.017          | 0.011  |                                           |
|                     | 1.0    | 0.343                                                       | 0.015     | 23.575  | 1.304E-17 |                                 |                  |                      |                |        |                                           |
|                     | 2.5    | 0.171                                                       | 0.016     | 11.002  | 1.224E-10 | 0.073                           | 0.238            | 0.249                | 0.018          | 0.059  |                                           |
|                     | 5.0    | 0.029                                                       | 0.014     | 2.072   | 4.971E-02 |                                 |                  |                      |                |        |                                           |
|                     | 10.0   |                                                             |           |         |           | 0.277                           | 1.661            |                      |                |        |                                           |
|                     | 15.0   |                                                             |           |         |           | 0.483                           | 1.991            |                      |                |        |                                           |
|                     |        |                                                             |           |         |           |                                 |                  | -46.625              | 0.251          | 10.341 | % Change compared to k <sub>0</sub> (c=0) |
| OV1946              | 0.0000 | 0.534                                                       | 0.013     | 40.147  | 4.467E-22 | 0.054                           | 0.010            | 0.570                | 0.031          | 0.006  |                                           |
|                     | 0.0025 | 0.529                                                       | 0.014     | 38.535  | 1.087E-21 |                                 |                  |                      |                |        |                                           |
|                     | 0.0050 | 0.451                                                       | 0.011     | 41.334  | 2.373E-22 |                                 |                  |                      |                |        |                                           |
|                     | 0.0100 | 0.202                                                       | 0.024     | 8.418   | 2.507E-08 | 0.440                           | 0.067            | 0.410                | 0.180          | 0.027  |                                           |
|                     | 0.1000 | 0.031                                                       | 0.026     | 1.181   | 2.504E-01 | 0.401                           | 0.127            |                      |                |        |                                           |
|                     | 0.2500 |                                                             |           |         |           | 0.551                           | 0.216            |                      |                |        |                                           |
|                     | 1.0000 |                                                             |           |         |           |                                 |                  |                      |                |        |                                           |
|                     |        |                                                             |           |         |           |                                 |                  | -28.112              | 26.259         | 3.807  | % Change compared to k <sub>0</sub> (c=0) |
